# Supplementary material for: Genetic and phenotypic differentiation of lumpfish ( Cyclopterus lumpus ) across the North Atlantic: implications for conservation and aquaculture
Source: PeerJ journal article supplement (doi:10.7717/peerj.5974), 2018-11-20

**Figure S2.** Likelihood plot showing mean Deviance Information Criterion (DIC) of the lowest 10 DIC values per  $K_{MAX}$  within lowest 10% of DIC, implemented in TESS analysis using 15 populations genotyped with 10 microsatellite loci.

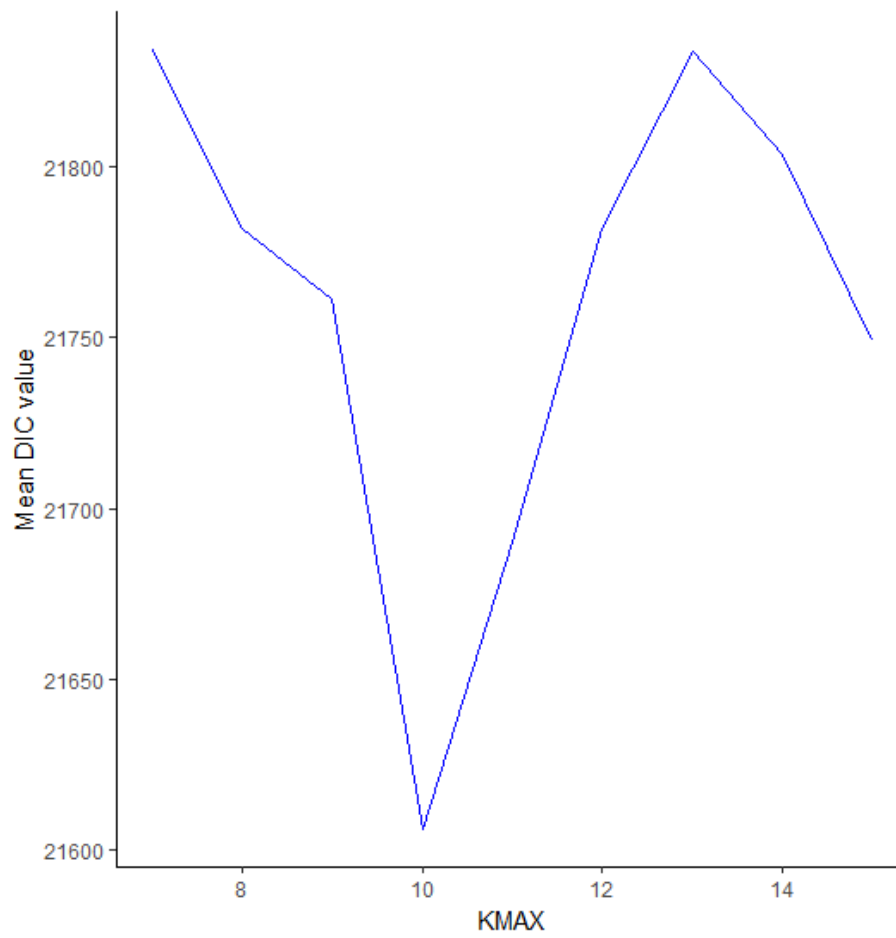

Supplement: Figure_S2.pdf [file Figure_S2.pdf]
