# Supplementary material for: Genetic and phenotypic differentiation of lumpfish (Cyclopterus lumpus) across the North Atlantic: implications for conservation and aquaculture
Source: PubMed Central journal article supplement (PMC6251346; doi:10.7717/peerj.5974), 2018-11-20

**Figure S1.** Likelihood plots showing number of clusters present in STRUCTURE analysis of 15 populations genotyped using 10 microsatellite loci, informed by median of means (MedMeaK), maximum of means (MaxMeaK), median of medians (MedMedK) and maximum of medians (MaxMedK) implemented in STRUCTURESELECTOR.

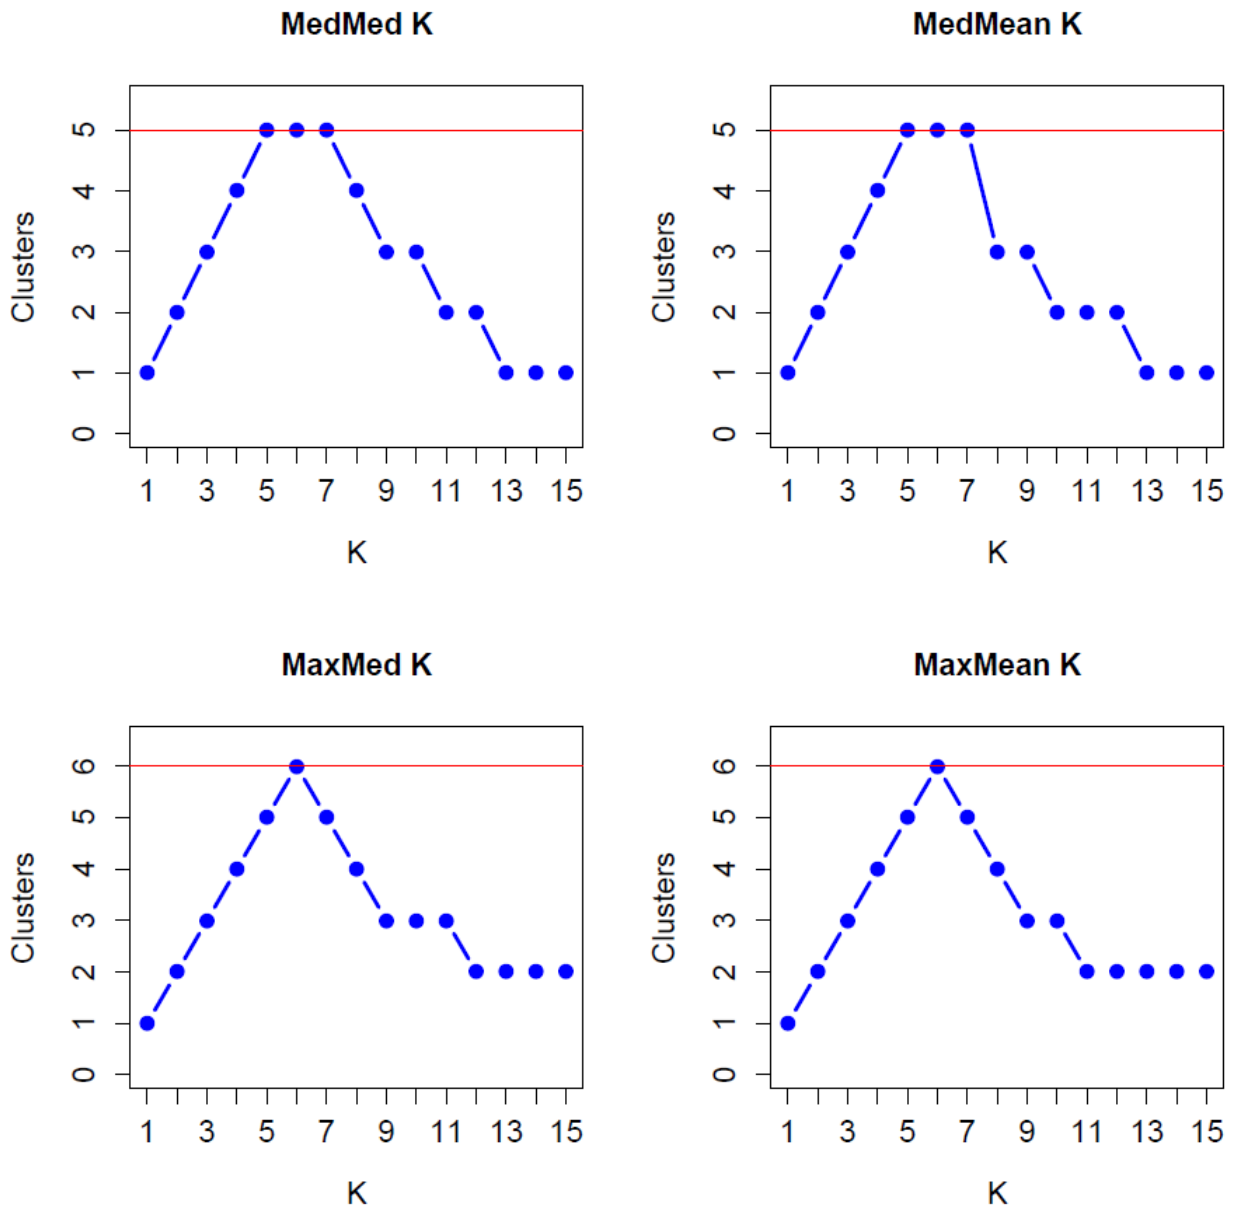

Supplement: peerj-06-5974-s015.pdf [file peerj-06-5974-s015.pdf]
