# Supplementary material for: Genetic and phenotypic differentiation of lumpfish (Cyclopterus lumpus) across the North Atlantic: implications for conservation and aquaculture
Source: PeerJ. 2018 Nov 20;6:e5974. doi: 10.7717/peerj.5974 (PMC6251346; doi:10.7717/peerj.5974)
Supplement: Supplemental Information 1 — Genetic and phenotypic data also deposited in figshare. [file peerj-06-5974-s001.xlsx]

## Sheet: Lumpfish
Fish_ID	Country	Location	Population	Date	Latitude	Longitude	Weight(g)	Length(mm)	Clu 12		Clu 26		Clu 29		Clu 33		Clu 34		Clu 36		Clu 37		Clu 40		Clu 44		Clu 45
1	USA	Frenchman Bay	FB	2016-12-15	44.328	-68.15			200	200	103	107	140	140	179	183	199	201	193	197	214	214			271	279	274	274
2	USA	Frenchman Bay	FB	2016-12-15	44.328	-68.15			200	200	107	107	140	140	179	183	185	203	193	197	214	218	256	260	279	279	277	280
3	USA	Frenchman Bay	FB	2016-12-15	44.328	-68.15			200	200	99	109	136	142	183	183	199	199	197	197	214	214	260	260	271	279	274	277
4	USA	Frenchman Bay	FB	2016-12-15	44.328	-68.15			202	202	99	109	138	138	179	179	183	201	197	199	214	218	250	254	271	279	277	277
5	USA	Frenchman Bay	FB	2016-12-15	44.328	-68.15			202	202	107	111	140	140	179	179	201	205	183	193	214	214	248	256	275	279	274	274
6	USA	Frenchman Bay	FB	2016-12-15	44.328	-68.15			200	202	109	109	138	138	179	179	185	199	193	197	214	220	250	256	271	279	274	277
7	USA	Frenchman Bay	FB	2016-12-15	44.328	-68.15			200	202	111	111	138	138	179	187	199	213	193	201	214	220	256	256	271	271	274	280
8	USA	Frenchman Bay	FB	2016-12-15	44.328	-68.15			202	202	107	111	140	140	179	179	201	205	183	193	214	214	248	256	275	279	274	274
9	USA	Frenchman Bay	FB	2016-12-15	44.328	-68.15			202	202	109	111	138	140	179	187	205	209	193	193	214	214	260	260	271	271	274	280
10	USA	Frenchman Bay	FB	2016-12-15	44.328	-68.15			202	202	99	99	138	140	179	183	185	205	193	193	214	220	260	260	271	271	274	280
11	USA	Frenchman Bay	FB	2016-12-15	44.328	-68.15			200	200	99	111	138	140	179	179	183	199	193	197	214	220	256	256	271	273	274	280
12	USA	Frenchman Bay	FB	2016-12-15	44.328	-68.15					109	111	138	140	179	183	205	209	193	193	220	220	256	260	271	271	277	277
13	USA	Frenchman Bay	FB	2016-12-15	44.328	-68.15			202	202	99	99	138	140	179	183	207	209	193	197	212	214	256	260	271	271	274	277
14	USA	Frenchman Bay	FB	2016-12-15	44.328	-68.15			194	194	99	105	138	140	179	179	183	197	193	197	214	220	256	256	271	271	274	274
15	USA	Frenchman Bay	FB	2016-12-15	44.328	-68.15			202	202	99	99	138	140	179	187	197	199	183	193	214	214	256	260	271	271	280	295
16	USA	Frenchman Bay	FB	2016-12-15	44.328	-68.15			202	202	99	111	138	140	183	183	203	205	193	193	214	214	250	254	271	273	274	286
17	USA	Frenchman Bay	FB	2016-12-15	44.328	-68.15			200	202	99	115	140	140	179	183	183	215	193	193	214	214	256	256	271	271	274	277
18	USA	Frenchman Bay	FB	2016-12-15	44.328	-68.15			200	202	107	113	140	140	179	179	201	205	193	197	214	214	256	260	271	279	277	277
19	USA	Frenchman Bay	FB	2016-12-15	44.328	-68.15			202	202	99	111	138	138	179	179	201	209	183	193	214	220	256	260	271	275	274	274
20	USA	Frenchman Bay	FB	2016-12-15	44.328	-68.15			202	202	109	109	138	140	179	179	183	201	193	195	214	218	250	256	271	271	271	277
21	USA	Frenchman Bay	FB	2016-12-15	44.328	-68.15			200	202	99	99	136	140	179	179	207	209	193	197	214	222	256	258	271	271	274	274
22	USA	Frenchman Bay	FB	2016-12-15	44.328	-68.15			200	202	99	99	140	140	179	181	201	205	193	197	212	214	260	260	271	279	274	274
23	USA	Frenchman Bay	FB	2016-12-15	44.328	-68.15			202	202	103	107	140	140	179	179	183	199	183	193	214	218	254	254	271	279	277	277
24	USA	Frenchman Bay	FB	2016-12-15	44.328	-68.15			200	202	107	109	138	142	179	179	183	199	193	193	214	214	248	260	271	279	274	274
25	USA	Frenchman Bay	FB	2016-12-15	44.328	-68.15			200	200	107	111	140	140	179	179	183	209	193	193	214	216	254	258	271	271	280	283
26	USA	Frenchman Bay	FB	2016-12-15	44.328	-68.15			200	200	107	111	140	140	179	179	183	213	193	193	214	214	254	256	271	271	271	277
27	USA	Frenchman Bay	FB	2016-12-15	44.328	-68.15			202	202	99	109	138	138	179	179	183	209	193	197	220	220	256	258	271	279	274	298
28	USA	Frenchman Bay	FB	2016-12-15	44.328	-68.15			194	202	99	111	138	138	179	179	183	205	183	183	214	222	250	260	271	271	274	274
29	USA	Frenchman Bay	FB	2016-12-15	44.328	-68.15			200	202	99	107	138	140	179	183	197	199	193	197	214	214	250	250	273	279	274	277
30	USA	Frenchman Bay	FB	2016-12-15	44.328	-68.15			202	202	107	111	138	138	179	183	183	201	193	193	218	220	256	256	271	275	274	274
31	USA	Cobscook Bay	CB	2016-12-15	44.902	-67.048			200	202	111	111	140	142	179	179	201	207	193	193	214	214	250	250	273	273	271	274
32	USA	Cobscook Bay	CB	2016-12-15	44.902	-67.048			200	202	105	111	136	140	183	183	203	213	193	197	214	218	250	260	271	279	274	277
33	USA	Cobscook Bay	CB	2016-12-15	44.902	-67.048			200	200	99	107	140	140	183	183	201	207	183	195	212	214	254	260	271	271	271	274
34	USA	Cobscook Bay	CB	2016-12-15	44.902	-67.048			200	202	99	107	136	138	179	179	183	205	193	197	214	216	254	260	271	271	271	274
35	USA	Cobscook Bay	CB	2016-12-15	44.902	-67.048			202	202	107	111	140	140	179	183	205	209	191	193	214	220	256	262	271	271	274	277
36	USA	Cobscook Bay	CB	2016-12-15	44.902	-67.048			202	202	109	111	140	140	179	179	207	211	193	193	214	218	256	260	277	279	277	277
37	USA	Cobscook Bay	CB	2016-12-15	44.902	-67.048			200	202	99	107	136	138	179	179	201	205	193	197	214	216	254	260	271	271	271	274
38	USA	Cobscook Bay	CB	2016-12-15	44.902	-67.048			200	200	99	107	140	140	183	183	201	207	183	195	212	214	254	260	271	271	271	274
39	USA	Cobscook Bay	CB	2016-12-15	44.902	-67.048			200	202	99	99	138	140	183	187	183	199	183	197	214	214	256	260	279	279	274	277
40	USA	Cobscook Bay	CB	2016-12-15	44.902	-67.048			200	200	99	109	138	140	183	183	201	209	193	193	214	226	258	260	271	271	274	274
41	USA	Cobscook Bay	CB	2016-12-15	44.902	-67.048			202	202	99	99	138	140	179	187	183	201	183	193	214	214	256	258	271	271	274	274
42	USA	Cobscook Bay	CB	2016-12-15	44.902	-67.048			200	202	105	107	134	138	177	179	183	219	183	195	220	220	250	258	271	271	274	277
43	USA	Cobscook Bay	CB	2016-12-15	44.902	-67.048			202	202	99	107	136	140	179	179	201	205	193	197	212	214	250	254	273	279	280	280
44	USA	Cobscook Bay	CB	2016-12-15	44.902	-67.048			202	202	99	109	138	140	183	183	205	209	183	197	214	220	260	260	271	279	271	277
45	USA	Cobscook Bay	CB	2016-12-15	44.902	-67.048			200	202	107	109	136	138	179	179	201	205	183	197	214	216	254	254	271	279	274	274
46	USA	Cobscook Bay	CB	2016-12-15	44.902	-67.048			200	202	107	119	140	140	183	189	197	209	183	193	214	220	250	260	271	271	274	277
47	USA	Cobscook Bay	CB	2016-12-15	44.902	-67.048			200	200	107	111	138	140	179	183	201	205	193	201	218	220	250	256	273	279	277	280
48	USA	Cobscook Bay	CB	2016-12-15	44.902	-67.048			202	202	99	107	138	138	177	179	183	183	183	193	214	218	250	258	271	271	274	286
49	USA	Cobscook Bay	CB	2016-12-15	44.902	-67.048			200	200	107	109	140	140	179	179	199	199	183	197	216	226	254	260	271	273	271	274
50	USA	Cobscook Bay	CB	2016-12-15	44.902	-67.048			194	194	99	111	138	140	179	187	201	209	183	201	214	214	250	256	271	271	280	280
51	USA	Cobscook Bay	CB	2016-12-15	44.902	-67.048			200	200	107	113	140	140	179	179	199	205	183	193	212	214	250	250	271	279	274	274
52	USA	Cobscook Bay	CB	2016-12-15	44.902	-67.048			202	202	99	107	136	136	179	179	183	205	193	197	214	216	256	256	271	273	271	280
53	USA	Cobscook Bay	CB	2016-12-15	44.902	-67.048			200	200	107	107	136	140	179	183	201	205	193	197	214	214	254	258	271	271	274	280
54	USA	Cobscook Bay	CB	2016-12-15	44.902	-67.048			200	202	99	111	134	140	183	183	205	205	193	197	214	220	250	256	271	271	277	277
55	USA	Cobscook Bay	CB	2016-12-15	44.902	-67.048			200	200	107	109	138	140	179	179	183	205	193	197	214	218	256	258	271	279	271	280
56	USA	Cobscook Bay	CB	2016-12-15	44.902	-67.048			200	202	99	109	140	140	179	179	195	199	193	193	214	214	258	260	271	271	277	280
57	USA	Cobscook Bay	CB	2016-12-15	44.902	-67.048			200	202	107	109	134	138	179	179	193	209	183	193	218	220	258	260	271	271	277	277
58	USA	Cobscook Bay	CB	2016-12-15	44.902	-67.048			200	200	107	107	140	140	177	179	201	207	185	197	212	214	254	256	271	271	271	277
59	USA	Cobscook Bay	CB	2016-12-15	44.902	-67.048			202	202	107	107	138	140	179	179	199	199	193	193	212	220	250	254	271	273	274	277
60	USA	Cobscook Bay	CB	2016-12-15	44.902	-67.048			200	200	105	111	136	140	179	183	201	201	193	193	214	220	250	250	271	271	274	274
61	Canada	Witless Bay	WB	2016-05-30	47.214	-52.689	3119	421	188	188	107	111	136	140	179	183	199	199	193	193	214	214	258	262	271	279	274	277
62	Canada	Witless Bay	WB	2016-05-30	47.214	-52.689	2985	428	188	188	105	109	136	140	183	183	201	205	193	199	214	214	256	264	271	279	274	277
63	Canada	Witless Bay	WB	2016-05-30	47.214	-52.689	4767	468	200	202	99	111	140	140	179	179	201	205	195	197	214	214	248	250	271	279	274	280
64	Canada	Witless Bay	WB	2016-05-30	47.214	-52.689	4386	445	200	202	107	111	136	140	183	183	199	209	191	197	216	216	250	260	271	279	274	274
65	Canada	Witless Bay	WB	2016-05-30	47.214	-52.689	3784	458	200	202	99	109	140	140	183	183	185	199	197	199	220	220	256	256	271	271	274	280
66	Canada	Witless Bay	WB	2016-05-30	47.214	-52.689	3395	405	188	188	99	99	138	140	177	179	201	201	193	193	214	220	254	264	271	279	274	283
67	Canada	Witless Bay	WB	2016-05-30	47.214	-52.689	4376	436	202	202	109	111	138	140	177	179	199	199	193	193	214	218	252	256	271	279	277	283
68	Canada	Witless Bay	WB	2016-05-30	47.214	-52.689	4650	451	200	202	105	107	140	140	179	179	199	203	193	197	218	220	260	260	279	279	277	280
69	Canada	Witless Bay	WB	2016-05-30	47.214	-52.689	3625	406	200	202	107	119	140	140	177	183	183	195	193	197	214	220	256	260	271	279	274	280
70	Canada	Witless Bay	WB	2016-05-30	47.214	-52.689	2955	373	200	202	99	109	140	140	183	183	199	199	193	201	214	218	250	260	279	279	274	274
71	Canada	Witless Bay	WB	2016-05-30	47.214	-52.689	3709	413	202	202	99	109	136	140	177	183	199	213	193	193	214	222	260	264	271	271	274	280
72	Canada	Witless Bay	WB	2016-05-30	47.214	-52.689	3216	402	200	202	107	111	138	138	179	183	207	207	193	197	214	220	254	260	271	279	271	274
73	Canada	Witless Bay	WB	2016-05-30	47.214	-52.689	3408	411	200	200	99	119	138	140	177	177	199	199	193	193	214	214	256	256	271	271	274	277
74	Canada	Witless Bay	WB	2016-05-30	47.214	-52.689	3406	402	200	202	109	113	140	140	179	183	183	199	193	203	214	220	250	254	271	279	274	277
75	Canada	Witless Bay	WB	2016-05-30	47.214	-52.689	3623	399	202	202	99	111	140	140	179	179	195	199	183	197	212	224	254	254	271	279	268	271
76	Canada	Witless Bay	WB	2016-05-30	47.214	-52.689	2934	403	190	190	99	109	140	140	179	179	199	199	193	197	214	216	250	260	271	279	271	271
77	Canada	Witless Bay	WB	2016-05-30	47.214	-52.689	2419	369	200	202	99	99	134	138	179	183	185	201	193	193	216	218	256	260	271	271	280	280
78	Canada	Witless Bay	WB	2016-05-30	47.214	-52.689	2059	349	202	202	99	111	140	140	179	179	201	205	187	197	214	214	254	260	271	271	280	283
79	Canada	Witless Bay	WB	2016-06-02	47.214	-52.689	4057	429	202	202	99	109	138	140	179	183	199	199	187	197	214	220	258	258	271	279	274	277
80	Canada	Witless Bay	WB	2016-06-02	47.214	-52.689	3341	410	202	202	99	111	134	140	175	179	199	199	193	193	214	220	250	256	271	279	274	277
81	Canada	Witless Bay	WB	2016-06-02	47.214	-52.689	4900	454	200	202	103	107	140	140	179	179	199	209	193	197	214	220	258	258	271	271	274	277
82	Canada	Witless Bay	WB	2016-06-02	47.214	-52.689	4850	468	188	188	107	111	138	138	183	183	203	209	193	193	214	214	256	256	271	279	274	277
83	Canada	Witless Bay	WB	2016-06-02	47.214	-52.689	3175	392	188	188	99	99	140	140	179	183	185	209	193	193	214	220	256	256	271	279	271	277
84	Canada	Witless Bay	WB	2016-06-02	47.214	-52.689	2864	414	194	200	107	109	140	140	179	183	185	201	193	193	216	220	250	254	279	279	274	277
85	Canada	Witless Bay	WB	2016-06-02	47.214	-52.689	3275	384	200	200	97	101	138	138	183	183	199	213	193	197	218	220	250	250	271	271	274	277
86	Canada	Witless Bay	WB	2016-06-02	47.214	-52.689	1250	305	200	202	99	111	140	140	179	179	201	205	193	201	220	220	254	260	279	279	274	277
87	Canada	Witless Bay	WB	2016-06-02	47.214	-52.689	4893	467	200	200	109	113	140	142	177	179	183	201	193	195	214	220	250	260	279	279	274	277
88	Canada	Witless Bay	WB	2016-06-02	47.214	-52.689	3633	458	200	202	107	113	140	140	177	183	183	209	193	195	214	220	250	250	271	279	271	274
89	Canada	Witless Bay	WB	2016-06-02	47.214	-52.689	4301	423	202	202	109	113	136	138	183	183	199	209	193	197	214	216	250	254	279	279	274	274
90	Canada	Witless Bay	WB	2016-06-02	47.214	-52.689	3970	449	202	202	109	119	138	140	177	179	199	209	193	193	216	220	250	254	271	271	274	274
91	Iceland	Hafnir	Ha	2016-06-13	63.9345	-22.6879			200	200	105	109	140	142	177	179	185	213	183	197	220	220	256	258	271	275	280	286
92	Iceland	Hafnir	Ha	2016-06-13	63.9345	-22.6879			194	200	107	111	136	142	179	187	183	213	185	199	214	220	258	258	271	275	271	283
93	Iceland	Hafnir	Ha	2016-06-13	63.9345	-22.6879			194	202	105	107	136	140	179	183	185	183	185	197	220	220	250	258	271	275	271	280
94	Iceland	Hafnir	Ha	2016-06-13	63.9345	-22.6879			200	202	99	109	140	140	177	179	185	185	197	199	214	220	258	264	279	279	280	280
95	Iceland	Hafnir	Ha	2016-06-13	63.9345	-22.6879			200	200	109	109	136	142	179	179	185	213	197	197	214	220	256	258	275	279	280	280
96	Iceland	Hafnir	Ha	2016-06-13	63.9345	-22.6879			194	200	105	109	136	136	179	185	199	213	193	197	220	220	258	258	271	271	271	280
97	Iceland	Hafnir	Ha	2016-06-13	63.9345	-22.6879			200	202	107	107	136	142	179	179	185	199	197	199	220	220	256	258	279	279	271	274
98	Iceland	Hafnir	Ha	2016-06-13	63.9345	-22.6879			194	202	105	109	136	142	177	179	183	185	193	197	214	214	256	262	271	271	283	280
99	Iceland	Hafnir	Ha	2016-06-13	63.9345	-22.6879			194	200	107	107	134	142	179	179	183	183	197	199	220	220	250	256	279	279	271	274
100	Iceland	Hafnir	Ha	2016-06-13	63.9345	-22.6879			200	200	107	109	136	140	179	179	183	203	193	199	212	220	252	264	279	279	274	289
101	Iceland	Hafnir	Ha	2016-06-13	63.9345	-22.6879			194	202	105	109	136	140	179	187	183	213	185	193	212	220	256	258	271	271	280	280
102	Iceland	Hafnir	Ha	2016-06-13	63.9345	-22.6879			200	200	107	109	136	138	179	179	183	183	193	199	220	220	258	258	271	279	274	280
103	Iceland	Hafnir	Ha	2016-06-13	63.9345	-22.6879			194	200	111	111	136	142	179	187	183	183	185	193	212	220	258	258	271	271	271	283
104	Iceland	Hafnir	Ha	2016-06-13	63.9345	-22.6879			194	200	107	107	134	142	179	179	201	199	197	199	214	226	250	256	271	271	271	274
105	Iceland	Hafnir	Ha	2016-06-13	63.9345	-22.6879			200	200	105	109	140	142	179	189	199	213	185	197	216	220	256	258	275	279	271	283
106	Iceland	Hafnir	Ha	2016-06-13	63.9345	-22.6879			200	200	107	107	136	142	179	179	199	199	185	197	220	220	250	256	271	279	271	280
107	Iceland	Hafnir	Ha	2016-06-13	63.9345	-22.6879			194	200	105	109	136	140	177	179	185	213	185	197	216	220	256	256	271	271	271	283
108	Iceland	Hafnir	Ha	2016-06-13	63.9345	-22.6879			194	200	105	109	136	140	177	179	185	199	197	197	220	220	248	260	275	279	280	283
109	Iceland	Hafnir	Ha	2016-06-13	63.9345	-22.6879			200	202	109	109	140	140	179	179	183	185	197	197	210	220	250	258	279	279	280	289
110	Iceland	Hafnir	Ha	2016-06-13	63.9345	-22.6879			200	200	107	107	136	142	179	179	185	183	185	193	214	214	250	256	271	271	280	289
111	Iceland	Hafnir	Ha	2016-06-13	63.9345	-22.6879			200	200	109	109	140	140	179	179	185	185	193	197	220	226	250	252	279	279	280	283
112	Iceland	Hafnir	Ha	2016-06-13	63.9345	-22.6879			200	200	107	111	142	142	177	179	185	185	193	197	212	220	258	258	271	275	280	283
113	Iceland	Hafnir	Ha	2016-06-13	63.9345	-22.6879			194	200	99	109	136	136	179	187	185	185	193	197	220	220	256	256	271	271	280	280
114	Iceland	Hafnir	Ha	2016-06-13	63.9345	-22.6879			190	200	109	109	134	140	179	179	183	185	197	199	220	220	258	258	271	279	280	280
115	Iceland	Hafnir	Ha	2016-06-13	63.9345	-22.6879			194	202	109	109	136	140	179	179	183	199	185	197	212	220	250	256	271	275	280	280
116	Iceland	Hafnir	Ha	2016-06-13	63.9345	-22.6879			194	200	99	109	136	136	179	187	183	183	185	193	220	220	258	258	271	271	271	280
117	Iceland	Hafnir	Ha	2016-06-13	63.9345	-22.6879			200	202	105	109	136	142	177	179	183	199	185	197	212	216	254	258	271	279	280	283
118	Iceland	Hafnir	Ha	2016-06-13	63.9345	-22.6879			200	200	105	109	136	142	179	179	183	183	185	199	214	226	250	256	271	279	271	274
119	Iceland	Hafnir	Ha	2016-06-13	63.9345	-22.6879			200	200	105	109	136	136	179	179	183	183	185	193	214	220	262	262	271	271	283	289
120	Iceland	Hafnir	Ha	2016-06-13	63.9345	-22.6879			194	200	99	109	136	136	179	185	183	183	185	193	220	220	258	258	271	271	280	280
121	Faroe Islands	Kollafjørður	Kl	2016-08-03	62.114	-6.9			200	200	103	107	136	142	179	187	183	199	193	197	220	222	256	256	271	271	274	280
122	Faroe Islands	Kollafjørður	Kl	2016-08-03	62.114	-6.9			192	202	107	109	128	136	183	189	181	185	191	193	220	220	256	258	279	283	274	283
123	Faroe Islands	Kollafjørður	Kl	2016-08-03	62.114	-6.9			200	200	103	107	142	142	179	187	199	207	193	193	214	226	256	256	271	271	274	292
124	Faroe Islands	Klasvík	Kl	2016-08-03	62.227	-6.577			192	200	107	109	134	140	187	189	183	183	193	199	220	220	256	258	279	283	277	289
125	Faroe Islands	Klasvík	Kl	2016-08-03	62.227	-6.577			194	194	105	105	126	126	179	187	185	185	189	189	220	224	256	256	271	271	289	289
126	Faroe Islands	Klasvík	Kl	2016-08-03	62.227	-6.577			194	202	105	109	136	136	183	185	183	183	193	193	212	220	256	256	271	271	277	289
127	Faroe Islands	Klasvík	Kl	2016-08-03	62.227	-6.577			200	202	105	109			179	189	185	185	199	199	214	220	254	258	271	275	286	292
128	Faroe Islands	Klasvík	Kl	2016-08-03	62.227	-6.577			200	200	109	109	142	142	185	189	185	185	193	197	212	218	256	256	271	271	286	292
129	Faroe Islands	Klasvík	Kl	2016-08-03	62.227	-6.577			200	200	105	109	142	142	183	185	183	183	193	197	212	218	256	256	271	271	286	292
130	Faroe Islands	Kollafjørður	Kl	2016-08-03	62.114	-6.9			200	202	107	109	142	142	179	189	183	183	199	199	214	220	256	258	271	275
131	Faroe Islands	Kollafjørður	Kl	2016-08-03	62.114	-6.9			194	202			136	136	185	187	181	183	193	193	212	220	256	256	271	271	277	289
132	Faroe Islands	Kollafjørður	Kl	2016-08-03	62.114	-6.9			194	200	107	109	134	136	183	185	183	183	193	197	220	220	250	258	271	275	274	286
133	Faroe Islands	Kollafjørður	Kl	2016-08-03	62.114	-6.9			194	200	105	109	134	140	185	191	185	185	193	199	220	220	250	256	271	271	277	289
134	Faroe Islands	Kollafjørður	Kl	2016-08-03	62.114	-6.9			200	200	109	111	142	142	185	187	199	207	193	193	214	226	250	256	271	279	274	292
135	Faroe Islands	Kollafjørður	Kl	2016-08-03	62.114	-6.9			194	202	107	107	134	142	187	189	181	185	197	197	220	220	250	258	271	279	280	286
136	Faroe Islands	Kollafjørður	Kl	2016-08-03	62.114	-6.9			200	200	109	111	136	142	187	187	185	199	193	197	220	222	250	256	271	279	274	280
137	Faroe Islands	Kollafjørður	Kl	2016-08-03	62.114	-6.9			200	202	107	109	136	142	183	185	183	183	193	199	214	220	250	258	271	275	274	277
138	Faroe Islands	Kollafjørður	Kl	2016-08-03	62.114	-6.9			200	202	109	109	140	142	177	183	183	183	193	197	220	220	256	258	275	279	274	286
139	Faroe Islands	Kollafjørður	Kl	2016-08-03	62.114	-6.9			192	202	107	111	134	138	179	185	183	183	187	193	220	220	256	256	271	275	274	286
140	Faroe Islands	Kollafjørður	Kl	2016-08-03	62.114	-6.9			200	200	107	109			179	187	185	185	193	197	220	220	256	260	271	271	274	283
141	Faroe Islands	Klasvík	Kl	2016-08-03	62.227	-6.577			192	200	107	109	136	138	177	183	181	185	193	197	214	220	248	250	271	275	274	283
142	Faroe Islands	Klasvík	Kl	2016-08-03	62.227	-6.577			200	202	107	107	136	142	179	183	181	185	191	193	220	220	250	256	275	281	280	283
143	Faroe Islands	Klasvík	Kl	2016-08-03	62.227	-6.577			200	202	107	109			179	183	183	187	191	195	220	220	250	250	275	281
144	Faroe Islands	Klasvík	Kl	2016-08-03	62.227	-6.577			200	200	107	109	136	142	179	183			193	197	220	220	250	250	275	281	283	283
145	Faroe Islands	Klasvík	Kl	2016-08-03	62.227	-6.577			200	200	105	109			185	189			193	197	220	220	250	260	271	279	277	280
146	Faroe Islands	Klasvík	Kl	2016-08-03	62.227	-6.577			200	202	99	109			179	183	181	185	191	195	220	220	256	258	271	279
147	Faroe Islands	Klasvík	Kl	2016-08-03	62.227	-6.577			192	192	107	111	136	142	179	187	195	199	193	193	214	220	258	258	271	279	274	283
148	Faroe Islands	Klasvík	Kl	2016-08-03	62.227	-6.577			190	192	107	109	134	136	179	189	183	183	191	193	220	220	256	256	275	275	283	286
149	Faroe Islands	Klasvík	Kl	2016-08-03	62.227	-6.577			200	200	99	107			187	187	189	189	197	197	220	226	256	258	271	271	271	271
150	Faroe Islands	Klasvík	Kl	2016-08-03	62.227	-6.577			200	200	107	107	136	140	179	181	181	185	193	197	214	220	262	262	271	271	283	292
151	Ventry Bay	Ireland	VB	2015-05-20	52.204	-10.124	217.89	175	200	200	107	107	136	142	177	179	185	185	193	193	220	220	256	258	271	271	274	277
152	Ventry Bay	Ireland	VB	2015-05-20	52.204	-10.124	109.98	150	200	202	109	109	136	142	179	179	181	183	193	193	220	220	248	254	271	279	271	277
153	Ventry Bay	Ireland	VB	2015-05-25	52.204	-10.124	178	177	194	200	107	109	140	142	177	185	183	183	193	201	214	220	250	256	271	271	280	289
154	Ventry Bay	Ireland	VB	2015-05-26	52.204	-10.124	108	144	198	202	107	107	136	136	183	185	185	211	183	197	214	214	256	258	275	283	274	283
155	Ventry Bay	Ireland	VB	2015-05-26	52.204	-10.124	177	175	200	200	109	109	142	142	179	189	183	199	193	193	212	220	256	258	271	271	283	283
156	Ventry Bay	Ireland	VB	2015-05-27	52.204	-10.124	170	166	200	200	109	119	136	140	179	189	183	209	185	201	214	226	256	258	271	271	274	283
157	Ventry Bay	Ireland	VB	2015-05-27	52.204	-10.124	460	243	200	200	109	109	128	134	183	187	183	183	193	193	220	220	256	256	279	279	274	280
158	Ventry Bay	Ireland	VB	2015-06-07	52.204	-10.124	130	144	200	202	99	109	136	140	177	189	181	183	193	199	222	226	250	256	271	279	274	286
159	Ventry Bay	Ireland	VB	2015-06-07	52.204	-10.124	230	184	200	200	109	109	134	134	179	183	185	185	193	199	212	220	254	260	271	271	274	277
160	Ventry Bay	Ireland	VB	2015-06-07	52.204	-10.124	255	181	200	200	107	109	134	142	177	179	183	209	185	199	218	220	248	254	279	279	277	286
161	Ventry Bay	Ireland	VB	2015-06-21	52.204	-10.124	180	184	200	202	109	111	138	142	179	189	185	199	183	193	214	220	246	258	271	271	277	280
162	Ventry Bay	Ireland	VB	2015-06-21	52.204	-10.124	520	244	200	200	105	107	136	136	177	179	185	185	193	197	214	220	250	258	271	275	283	283
163	Ventry Bay	Ireland	VB	2015-06-22	52.204	-10.124	220	156	192	200	105	107	138	138	177	179	183	183	193	197	220	226	250	254	271	275	283	289
164	Ventry Bay	Ireland	VB	2015-06-22	52.204	-10.124	276.9	184	192	192	107	111	136	142	177	179	181	185	193	193	220	220	256	256	271	271	274	280
165	Ventry Bay	Ireland	VB	2015-06-26	52.204	-10.124	260	190	200	202	107	107	136	142	179	185	181	185	193	193	220	220	256	258	271	271	283	283
166	Ventry Bay	Ireland	VB	2015-06-29	52.204	-10.124	336	190	200	200	107	109	134	142	179	191	181	183	193	193	220	220	250	254	271	279	277	280
167	Ventry Bay	Ireland	VB	2015-06-29	52.204	-10.124	245	179	200	200	107	109	134	142	177	179	199	209	185	193	214	214	256	256	271	271	274	277
168	Ventry Bay	Ireland	VB	2015-07-03	52.204	-10.124	168	174	200	200	109	109	140	140	177	189	183	201	199	199	220	220	256	258	271	271	274	280
169	Ventry Bay	Ireland	VB	2015-07-03	52.204	-10.124	386	225	194	200	107	107	136	142	185	189	183	209	183	193	220	220	256	258	271	271	283	286
170	Ventry Bay	Ireland	VB	2015-07-03	52.204	-10.124	688	248	200	200	109	109	136	142	177	179	185	199	193	197	216	226	256	260	271	279	286	286
171	Ventry Bay	Ireland	VB	2015-07-04	52.204	-10.124	1754	319	194	202	107	107	136	142	179	185	183	183	193	197	220	226	250	256	271	275	283	286
172	Ventry Bay	Ireland	VB	2015-07-07	52.204	-10.124	415.31	246	200	200	109	109	136	142	185	189	183	183	185	193	220	220	256	260	271	271	283	286
173	Ventry Bay	Ireland	VB	2015-07-07	52.204	-10.124	765	249	200	202	107	109	134	136	179	181	183	183	193	199	220	220	256	258	271	271	283	286
174	Ventry Bay	Ireland	VB	2015-07-07	52.204	-10.124	705	264	200	202	107	107	136	136	177	179	183	183	193	197	220	220	262	262	271	275	283	286
175	Ventry Bay	Ireland	VB	2015-07-07	52.204	-10.124	790	245	202	202	109	109	136	140	179	185	183	199	193	199	214	220	250	256	275	279	280	280
176	Ventry Bay	Ireland	VB	2015-07-07	52.204	-10.124	235	345	200	200	107	109	134	142	177	179	183	183	193	201	214	220	250	258	271	279	274	277
177	Ventry Bay	Ireland	VB	2015-07-11	52.204	-10.124			200	200	107	113	136	140	179	179	183	183	193	197	220	220	258	258	271	279	283	292
178	Ventry Bay	Ireland	VB	2015-12-01	52.204	-10.124			200	200	109	111	136	142	179	181	181	185	193	197	212	220	256	256	271	275	283	286
179	Ventry Bay	Ireland	VB	2015-12-01	52.204	-10.124			200	200	103	109	136	140	177	177	185	199	183	201	214	220	258	262	271	271	277	283
180	Ventry Bay	Ireland	VB	2016-01-05	52.204	-10.124			200	202	107	107	136	142	177	189	185	201	193	193	220	220	250	256	271	271	280	283
181	Outer Hebrides	Scotland	OH	2017-05-11	58.164	-6.377	2150	380	194	200	105	111	136	136	177	179	183	211	193	201	214	214	256	258	271	275	274	286
182	Outer Hebrides	Scotland	OH	2017-05-11	58.164	-6.377	2300	400	192	192	107	111	134	142	177	183	183	183	193	197	212	220	250	262	271	279	280	292
183	Outer Hebrides	Scotland	OH	2017-05-11	58.164	-6.377	765	260	192	200	101	107	136	142	177	177	183	183	185	199	212	220	250	256	271	279	277	286
184	Outer Hebrides	Scotland	OH	2017-05-11	58.164	-6.377	2500	440	200	200	107	109	134	136	179	185	183	199	183	193	212	214	256	260	271	287	274	286
185	Outer Hebrides	Scotland	OH	2017-05-11	58.164	-6.377	3500	460	192	200	107	107	136	136	179	179	183	199	185	185	220	220	250	250	271	279	277	283
186	Outer Hebrides	Scotland	OH	2017-05-11	58.164	-6.377	3000	430	192	192	109	111	136	136	183	183	183	209	197	199	212	220	260	262	273	279	277	283
187	Outer Hebrides	Scotland	OH	2017-05-11	58.164	-6.377	3200	350	200	200	107	107	136	136	177	179	183	183	185	197	212	220	258	262	271	279	277	280
188	Outer Hebrides	Scotland	OH	2017-05-11	58.164	-6.377	3000	420	200	200	107	107	136	142	183	187	199	199	183	193	220	220	250	250	271	279	280	289
189	Outer Hebrides	Scotland	OH	2017-05-11	58.164	-6.377	2800	397	194	200	107	119	134	142	179	183	183	199	185	193	212	220	250	256	271	271	283	283
190	Outer Hebrides	Scotland	OH	2017-05-11	58.164	-6.377	3561	431	200	200	107	107	134	142	179	181	183	183	193	193	214	220	248	250	271	279	274	283
191	Outer Hebrides	Scotland	OH	2017-05-11	58.164	-6.377	2600	401	200	202	107	109	134	136	179	183	181	183	185	193	214	220	256	256	271	279	271	289
192	Outer Hebrides	Scotland	OH	2017-05-11	58.164	-6.377	3491	420	200	200	107	107	140	140	179	179	183	183	193	195	220	220	250	258	271	275	271	280
193	Outer Hebrides	Scotland	OH	2017-05-11	58.164	-6.377	2905	392	200	200	107	107	136	142	177	183	183	199	193	197	220	220	256	258	271	271	280	286
194	Outer Hebrides	Scotland	OH	2017-05-11	58.164	-6.377	2900	298	194	200	107	107	140	140	177	189	183	205	185	197	220	220	248	258	271	271	280	283
195	Outer Hebrides	Scotland	OH	2017-05-11	58.164	-6.377	3110	394	192	200	107	107	136	142	179	185	183	183	193	193	220	220	250	258	271	279	283	286
196	Outer Hebrides	Scotland	OH	2017-05-11	58.164	-6.377	3961	440	194	202	107	109	136	136	179	185	183	183	193	197	220	222	250	256	271	279	274	280
197	Outer Hebrides	Scotland	OH	2017-05-11	58.164	-6.377	3600	410	200	202	109	109	136	142	179	179	183	183	197	199	220	220	256	258	271	275	286	286
198	Outer Hebrides	Scotland	OH	2017-05-11	58.164	-6.377	2925	319	194	200	107	107	136	142	179	185	183	183	193	193	220	220	250	258	271	279	283	286
199	Outer Hebrides	Scotland	OH	2017-05-11	58.164	-6.377			200	200	107	109	136	142	183	189	183	183	197	197	220	220	256	262	279	279	274	283
200	Outer Hebrides	Scotland	OH	2017-05-11	58.164	-6.377			194	200	107	107	136	136	185	189	183	183	183	197	220	226	250	256	271	271	280	289
201	Outer Hebrides	Scotland	OH	2017-05-11	58.164	-6.377			200	200	99	107	134	140	179	179	183	183	193	199	220	226	256	258	271	271	271	274
202	Outer Hebrides	Scotland	OH	2017-05-11	58.164	-6.377			200	200	107	109	136	136	183	183	183	183	185	193	216	226	250	256	279	279	274	283
203	Outer Hebrides	Scotland	OH	2017-05-11	58.164	-6.377			200	200	99	105	136	142	177	187	185	185	199	197	216	220	256	262	271	271	274	286
204	Outer Hebrides	Scotland	OH	2017-05-11	58.164	-6.377			200	200	107	109	136	138	185	189	185	185	193	197	220	220	254	258	271	275	277	286
205	Outer Hebrides	Scotland	OH	2017-05-11	58.164	-6.377			200	200	109	109	136	142	179	179	183	185	193	197	220	222	258	258	271	271	280	280
206	Outer Hebrides	Scotland	OH	2017-05-11	58.164	-6.377			200	200	99	107	136	140	179	183	185	215	197	197	212	220	258	260	279	279	271	280
207	Outer Hebrides	Scotland	OH	2017-05-11	58.164	-6.377			194	202	109	109	140	142	179	189	183	183	193	197	212	220	250	250	271	271	274	283
208	Outer Hebrides	Scotland	OH	2017-05-11	58.164	-6.377			200	200	107	107	136	136	179	179	183	183	185	193	220	220	260	264	279	279	280	286
209	Outer Hebrides	Scotland	OH	2017-05-11	58.164	-6.377			200	200	107	107	136	142	185	185	183	199	193	193	220	222	256	258	271	271	277	286
210	Outer Hebrides	Scotland	OH	2017-05-11	58.164	-6.377			200	200	107	109	136	138	177	189	183	183	193	193	212	220	250	262	271	279	286	289
211	Weymouth	England	We	2015-02-26	50.6144	-2.45762	4515	462	200	200	109	109	128	142	183	185	183	183	197	197	212	220	250	256	271	279	274	286
212	Weymouth	England	We	2015-02-26	50.6144	-2.45762	2425	367	200	200	109	109	136	138	179	179	185	185	185	197	214	220	256	256	271	279	280	292
213	Weymouth	England	We	2015-02-26	50.6144	-2.45762	3400	431	200	200	107	107	134	136	183	189	183	183	185	185	212	220	256	258	279	279	274	280
214	Weymouth	England	We	2015-02-26	50.6144	-2.45762	3565	460	200	202	107	109	136	140	179	185	185	199	185	193	218	220	250	256	271	279	277	286
215	Weymouth	England	We	2015-02-21	50.6144	-2.45762	1345	312	200	200	109	119	136	138	183	187	183	183	197	197	212	220	250	256	271	279	274	280
216	Weymouth	England	We	2015-02-21	50.6144	-2.45762	1225	314	200	200	109	111	128	134	179	185	185	199	193	193	220	220	250	260	279	279	274	280
217	Weymouth	England	We	2015-02-21	50.6144	-2.45762	1445	336	200	200	109	113	134	136	179	179	185	199	185	197	220	220	256	256	271	275	280	280
218	Weymouth	England	We	2015-02-21	50.6144	-2.45762	785	279	200	200	105	109	134	142	177	183	183	183	193	193	220	220	256	262	271	271	277	280
219	Weymouth	England	We	2015-02-18	50.6144	-2.45762	1805	361	200	200	107	109	134	140	183	189	183	201	193	197	214	220	252	256	271	279	283	286
220	Weymouth	England	We	2015-02-18	50.6144	-2.45762	1755	333	200	200	107	109	128	134	179	179	183	183	193	197	220	220	256	262	271	279	283	286
221	Weymouth	England	We	2015-02-18	50.6144	-2.45762	975	296	200	200	107	109	134	140	179	183	183	185	193	199	218	220	262	262	271	279	283	289
222	Weymouth	England	We	2015-02-09	50.6144	-2.45762	4890	530	200	200	107	109	128	138	177	183	185	199	193	197	220	220	256	262	271	279	283	283
223	Weymouth	England	We	2015-02-09	50.6144	-2.45762	3540	464	200	200	99	99	136	142	179	179	183	183	193	197	220	220	250	250	271	279	277	283
224	Weymouth	England	We	2015-02-09	50.6144	-2.45762	1510	320	200	200	107	109	128	134	183	189	183	183	197	199	214	220	256	262	279	279	274	280
225	Weymouth	England	We	2015-02-09	50.6144	-2.45762	1510	325	200	202	107	109	136	140	179	179	183	183	193	197	220	226	250	254	271	279	274	286
226	Weymouth	England	We	2015-02-09	50.6144	-2.45762	1495	330	200	202	109	109	134	140	185	189	183	183	193	199	220	220	256	256	271	279	274	283
227	Weymouth	England	We	2015-02-09	50.6144	-2.45762	896	265	200	200	109	111	136	136	179	179	183	183	197	197	220	220	256	262	271	279	274	280
228	Weymouth	England	We	2015-02-09	50.6144	-2.45762	1010	280	200	200	107	111	136	138	179	183	183	183	197	197	220	220	264	264	271	279	271	283
229	Weymouth	England	We	2015-02-09	50.6144	-2.45762	1795	300	194	200	107	109	134	138	179	179	183	183	193	193	212	220	250	256	271	279	283	283
230	Weymouth	England	We	2015-04-01	50.6144	-2.45762	1585	330	198	200	107	107	128	142	179	185	183	183	199	199	214	220	250	262	279	279	283	289
231	Weymouth	England	We	2015-04-01	50.6144	-2.45762	5685	430	200	200	109	109	136	136	177	185	183	183	193	193	220	220	262	262	279	279	277	283
232	Weymouth	England	We	2015-04-01	50.6144	-2.45762	1680	330	200	200	107	107	136	136	179	179	183	195	193	193	212	220	254	266	271	279	274	283
233	Weymouth	England	We	2015-04-01	50.6144	-2.45762	1130	295	200	200	107	109	140	140	179	185	181	183	193	193	212	220	256	262	279	279	274	292
234	Weymouth	England	We	2015-04-01	50.6144	-2.45762	6010	470	200	200	107	111	136	142	183	189	183	183	193	193	220	220	250	256	271	279	274	277
235	Weymouth	England	We	2015-01-03	50.6144	-2.45762	1610	330	200	200	109	111	136	140	179	179	181	183	193	193	214	220	256	258	271	279	283	283
236	Weymouth	England	We	2015-01-03	50.6144	-2.45762	5765	460	194	200	109	111	136	140	179	185	183	183	193	197	220	220	256	256	271	271	274	280
237	Weymouth	England	We	2015-01-07	50.6144	-2.45762	2255	370	200	200	109	111	136	136	179	185	183	183	193	193	214	220	250	262	271	271	280	286
238	Weymouth	England	We	2015-01-07	50.6144	-2.45762	1740	340	200	200	107	109	136	142	179	185	181	183	193	193	220	220	256	266	271	279	277	289
239	Weymouth	England	We	2015-01-03	50.6144	-2.45762	1010	280	194	200	107	107	136	136	177	185	181	183	193	197	220	220	250	256	279	279	280	292
240	Weymouth	England	We	2015-01-03	50.6144	-2.45762	1525	320	200	200	107	109	136	142	179	179	181	183	197	199	212	220	256	264	271	279	283	292
241	Guernsey	England	Gu	2015-02-27	49.4657	-2.58527	3975	440	194	200	99	109	128	136	179	183	185	185	193	197	220	220	258	262	279	279	271	274
242	Guernsey	England	Gu	2015-02-27	49.4657	-2.58527	4915	482	200	202	107	111	136	138	179	185	183	183	193	193	220	220	256	256	271	279	271	283
243	Guernsey	England	Gu	2015-02-27	49.4657	-2.58527	4960	442	192	200	107	107	138	142	179	189	183	183	183	193	220	220	262	262	279	279	274	286
244	Guernsey	England	Gu	2015-02-27	49.4657	-2.58527	3365	442	200	202	107	107	136	140	183	189	183	183	193	197	220	220	250	256	279	279	274	283
245	Guernsey	England	Gu	2015-02-27	49.4657	-2.58527	5045	445	200	200	107	107	136	142	179	179	183	183	185	193	220	220	256	260	271	279	271	283
246	Guernsey	England	Gu	2015-02-27	49.4657	-2.58527	4700	459	200	200	107	109	134	140	183	185	185	185	193	199	220	220	260	262	279	279	274	283
247	Guernsey	England	Gu	2015-02-27	49.4657	-2.58527	1040	299	192	200	107	107	136	142	179	185	183	183	193	193	220	220	256	262	271	279	274	289
248	Guernsey	England	Gu	2015-02-27	49.4657	-2.58527	4140	460	192	200	107	109	136	142	179	183	183	183	197	197	218	220	250	256	279	287	274	280
249	Guernsey	England	Gu	2015-02-27	49.4657	-2.58527	6835	570	192	200	107	109	134	138	179	183	183	183	199	199	214	220	250	250	271	271	274	283
250	Guernsey	England	Gu	2015-02-27	49.4657	-2.58527	2870	443	200	200	107	109	128	136	189	189	183	183	193	197	212	220	256	260	279	279	277	280
251	Guernsey	England	Gu	2015-02-27	49.4657	-2.58527	6140	468	200	200	107	109	136	136	179	179	183	183	193	193	212	220	262	264	279	281	277	283
252	Guernsey	England	Gu	2015-02-27	49.4657	-2.58527	5120	486	200	200	107	107	134	138	179	183	183	199	185	197	220	220	246	256	271	279	274	277
253	Guernsey	England	Gu	2015-02-27	49.4657	-2.58527	4304	488	200	200	107	109	134	136	179	185	183	183	197	197	214	220	256	262	279	279	283	286
254	Guernsey	England	Gu	2015-02-27	49.4657	-2.58527	3590	436	200	200	109	109	136	142	179	189	183	183	185	193	220	222	250	260	271	279	274	286
255	Guernsey	England	Gu	2015-02-27	49.4657	-2.58527	6445	526	200	202	105	107	136	140	179	189	183	183	197	197	220	220	256	262	271	271	274	283
256	Guernsey	England	Gu	2015-02-27	49.4657	-2.58527	4240	440	192	200	107	109	134	138	183	183	183	183	193	197	212	220	250	262	279	279	283	289
257	Guernsey	England	Gu	2015-02-27	49.4657	-2.58527	4040	472	200	200	107	109	138	142	185	189	185	185	193	193	220	220	256	262	271	279	274	283
258	Guernsey	England	Gu	2015-02-27	49.4657	-2.58527	5080	468	200	200	109	109	136	138	183	185	185	185	193	197	220	220	260	262	271	279	274	280
259	Guernsey	England	Gu	2015-02-27	49.4657	-2.58527	3770	464	194	198	111	111	138	140	183	183	185	183	193	193	212	220	262	264	271	279	280	283
260	Guernsey	England	Gu	2015-02-14	49.4657	-2.58527	2750	416	192	200	109	111	136	136	179	179	183	183	193	193	220	220	250	264	271	279	274	292
261	Guernsey	England	Gu	2015-02-14	49.4657	-2.58527	3250	458	200	200	105	107	136	140	185	189	183	183	193	197	220	220	250	256	271	279	277	283
262	Guernsey	England	Gu	2015-02-14	49.4657	-2.58527	5680	450	200	200	99	109	134	138	179	189	183	183	193	193	212	220	262	262	271	279	283	286
263	Guernsey	England	Gu	2015-02-14	49.4657	-2.58527	4695	482	200	200	107	107	136	142	179	187	183	199	185	197	214	222	256	262	271	279	280	286
264	Guernsey	England	Gu	2015-02-14	49.4657	-2.58527	5600	459	200	200	99	107	136	138	179	183	185	185	193	197	212	220	262	262	271	279	274	286
265	Guernsey	England	Gu	2015-02-14	49.4657	-2.58527	4765	471	200	200	107	109	128	136	179	189	183	183	197	197	220	220	250	256	275	279	280	280
266	Guernsey	England	Gu	2015-02-14	49.4657	-2.58527	739	530	200	200	107	107	128	138	185	185	183	183	193	197	220	220	250	258	271	275	283	286
267	Guernsey	England	Gu	2015-02-14	49.4657	-2.58527	5570	480	200	200	109	109	128	136	177	179	183	183	185	197	220	220	250	262	279	279	277	289
268	Guernsey	England	Gu	2015-02-14	49.4657	-2.58527	1015	306	200	200	107	111	134	136	183	189	185	185	185	193	212	214	256	266	271	279	274	286
269	Guernsey	England	Gu	2015-03-21	49.4657	-2.58527	7040	510			107	107	128	136	177	189	183	183	193	197	214	220	256	256	271	271	283	283
270	Guernsey	England	Gu	2015-03-21	49.4657	-2.58527	6185	510	200	200	99	107	138	142	179	183	183	183	185	193	220	220	250	256	271	279	283	292
271	Namsen	Norway	Na	2017-03-28	59.149	6.014	4104	395	200	200	109	109	136	142	177	189	183	183	193	193	220	220	250	260	279	279	274	280
272	Namsen	Norway	Na	2017-03-28	59.149	6.014	3938	390	200	200	107	109	138	142	183	183	199	199	193	199	214	220	254	260	271	275	280	292
273	Namsen	Norway	Na	2017-03-28	59.149	6.014	4138	370	192	200	107	107	136	142	177	183	183	183	193	197	220	220	254	256	271	271	280	283
274	Namsen	Norway	Na	2017-03-28	59.149	6.014	3874	395	200	200	109	109	134	136	177	179	183	183	191	197	220	220	252	260	271	279	274	280
275	Namsen	Norway	Na	2017-03-28	59.149	6.014	3618	380	200	202	107	109	138	142	177	191	183	183	193	197	220	220	250	258	271	279	280	283
276	Namsen	Norway	Na	2017-03-28	59.149	6.014	3402	360	200	200	107	107	136	138	177	179	183	183	193	197	220	224	256	256	271	275	283	283
277	Namsen	Norway	Na	2017-03-28	59.149	6.014	3458	380	200	200	107	107	136	140	183	189	183	183	193	197	214	214	256	256	275	279	274	289
278	Namsen	Norway	Na	2017-03-28	59.149	6.014	2866	355	200	200	107	121	136	136	177	179	183	183	193	201	210	218	256	258	275	275	280	289
279	Namsen	Norway	Na	2017-03-28	59.149	6.014	3978	380	200	200	109	109	136	136	177	189	183	183	193	201	216	220	256	256	271	279	280	289
280	Namsen	Norway	Na	2017-03-28	59.149	6.014	2538	350	200	200	107	107	136	138	177	179	183	183	193	197	212	212	256	262	271	273	283	286
281	Namsen	Norway	Na	2017-03-28	59.149	6.014	1078	260	194	200	99	107	136	142	179	179	183	203	185	193	220	220	256	260	271	275	286	286
282	Namsen	Norway	Na	2017-03-28	59.149	6.014	1300	290	200	200	99	107	136	136	179	187	183	183	197	199	220	226	250	258	271	275	286	286
283	Namsen	Norway	Na	2017-03-28	59.149	6.014	1698	325	200	202	107	107	136	140	179	183	183	199	193	197	220	220	256	256	271	271	268	271
284	Namsen	Norway	Na	2017-03-28	59.149	6.014	2208	340	200	200	99	109	136	142	177	183	183	199	193	193	220	220	250	256	271	279	277	283
285	Namsen	Norway	Na	2017-03-28	59.149	6.014	1774	300	200	202	109	119	136	142	177	183	183	183	185	197	220	220	250	256	279	279	274	277
286	Namsen	Norway	Na	2017-03-28	59.149	6.014	1758	315	194	200	107	107	140	140	183	189	201	207	183	195	214	214	250	256	271	271	271	274
287	Namsen	Norway	Na	2017-03-28	59.149	6.014	1146	265	194	200	107	107	136	136	183	189	185	185	193	193	214	214	250	256	271	271	277	283
288	Namsen	Norway	Na	2017-03-28	59.149	6.014	1350	265	200	202	107	111	138	142	179	183	183	183	193	199	220	220	256	256	271	279	271	277
289	Namsen	Norway	Na	2017-03-28	59.149	6.014	2904	350	200	200	109	109	136	136	179	183	183	183	193	193	220	220	250	262	271	271	280	283
290	Namsen	Norway	Na	2017-03-28	59.149	6.014	2992	370	200	200	107	109	134	142	177	177	183	183	191	197	220	220	256	258	271	271	286	286
291	Namsen	Norway	Na	2017-03-28	59.149	6.014	2848	355	200	200	107	107	134	136	179	183	183	199	193	197	220	220	250	250	271	275	274	280
292	Averøy	Norway	Av	2016-04-30	63.053	7.476			194	200	107	109	136	138	179	189	185	185	193	197	220	220	256	256	271	279	280	283
293	Averøy	Norway	Av	2016-04-30	63.053	7.476			202	202	107	109	136	138	179	193	185	185	185	193	220	220	258	262	275	279	274	286
294	Averøy	Norway	Av	2016-04-30	63.053	7.476			200	200	107	109	136	142	183	189	183	193	197	199	214	214	250	250	271	271	274	283
295	Averøy	Norway	Av	2016-04-30	63.053	7.476			200	200	107	111	140	142	181	189	183	183	193	199	214	220	254	262	271	271	283	283
296	Averøy	Norway	Av	2016-04-30	63.053	7.476			200	200	107	109	136	142	183	183	181	193	193	193	220	220	250	250	271	279	274	283
297	Averøy	Norway	Av	2016-04-30	63.053	7.476			200	202	109	109	136	140	177	183	185	199	193	199	220	220	256	262	271	275	283	289
298	Averøy	Norway	Av	2016-04-30	63.053	7.476			200	200	107	109	138	140	183	189	183	193	197	199	220	220	250	254	271	279	274	277
299	Averøy	Norway	Av	2016-04-30	63.053	7.476			200	200	107	109	138	140	183	189	185	195	197	199	220	220	250	254	271	279	274	286
300	Averøy	Norway	Av	2016-04-30	63.053	7.476			200	202	105	107	136	140	179	179	183	199	193	199	214	220	256	262	273	273	283	286
301	Averøy	Norway	Av	2016-04-30	63.053	7.476			200	200	107	109	138	140	183	189	181	183	197	199	220	220	254	256	271	279	274	286
302	Averøy	Norway	Av	2016-04-30	63.053	7.476			200	202	107	109	134	138	177	183	183	199	193	193	214	220	250	252	271	279	274	292
303	Averøy	Norway	Av	2016-04-30	63.053	7.476			200	200	107	109	138	142	183	187	183	199	193	193	220	226	250	252	269	273	277	277
304	Averøy	Norway	Av	2016-04-30	63.053	7.476			200	200	107	109	134	138	177	189	183	183	193	193	220	226	252	256	273	273	274	286
305	Averøy	Norway	Av	2016-04-30	63.053	7.476			200	200	107	107	134	138	177	189	197	201	193	197	220	226	250	256	271	271	277	283
306	Averøy	Norway	Av	2016-04-30	63.053	7.476			200	202	109	109	134	138	183	189	183	199	193	193	220	220	256	256	271	271	277	283
307	Averøy	Norway	Av	2016-04-30	63.053	7.476			200	200	99	107	138	142	183	189	183	199	197	199	220	226	252	260	271	279	274	277
308	Averøy	Norway	Av	2016-04-30	63.053	7.476			200	200	107	107	138	142	177	189	183	183	193	197	220	220	256	260	271	279	274	277
309	Averøy	Norway	Av	2016-04-30	63.053	7.476			194	202	109	109	134	140	177	177	183	183	193	193	220	220	256	256	271	271	277	280
310	Averøy	Norway	Av	2016-04-30	63.053	7.476			200	202	107	107	134	142	177	187	183	199	193	193	220	220	250	256	271	279	277	286
311	Averøy	Norway	Av	2016-04-30	63.053	7.476			200	202	107	107	136	140	177	189	183	183	193	199	220	220	250	256	271	271	277	280
312	Averøy	Norway	Av	2016-04-30	63.053	7.476			200	200	99	109	136	138	177	189	199	199	193	197	220	226	252	260	271	271	274	277
313	Averøy	Norway	Av	2016-04-30	63.053	7.476			200	202	107	107	138	140	177	189	183	183	193	193	220	226	256	256	271	279	280	286
314	Averøy	Norway	Av	2016-04-30	63.053	7.476			200	202	107	109	134	136	183	183	185	199	193	199	220	226	256	256	271	271	274	277
315	Averøy	Norway	Av	2016-04-30	63.053	7.476			200	200	109	109	138	138	177	189	185	185	185	193	214	226	256	256	271	271	274	283
316	Averøy	Norway	Av	2016-04-30	63.053	7.476			194	200	107	109	138	142	183	189	183	199	193	193	214	220	256	262	271	279	283	289
317	Averøy	Norway	Av	2016-04-30	63.053	7.476			194	200	109	109	138	140	183	189	183	199	193	193	212	220	252	256	271	271	274	280
318	Averøy	Norway	Av	2016-04-30	63.053	7.476			202	202	99	107	140	140	177	177	183	183	193	197	212	220	256	258	271	279	274	274
319	Averøy	Norway	Av	2016-04-30	63.053	7.476			200	202	107	109	134	138	183	189	183	199	193	193	214	226	252	256	271	271	277	286
320	Averøy	Norway	Av	2016-04-30	63.053	7.476			200	200	107	109	136	138	183	183	183	199	189	193	220	220	256	256	271	271	274	277
321	Averøy	Norway	Av	2016-04-30	63.053	7.476			200	202	107	109	136	140	187	189	183	199	193	201	220	220	250	256	271	279	274	277
322	Rogaland	Norway	Ro	2016-07-11	59.1489	6.01434			194	200	107	107	136	142	179	179	185	185	193	197	214	220	256	256	271	271	280	283
323	Rogaland	Norway	Ro	2016-07-11	59.1489	6.01434			192	192	109	111	136	136	179	183	185	185	193	199	220	220	256	256	275	279	277	283
324	Rogaland	Norway	Ro	2016-07-11	59.1489	6.01434			192	192	107	107	136	136	179	179	185	185	193	197	220	226	256	262	279	279	283	283
325	Rogaland	Norway	Ro	2016-07-11	59.1489	6.01434			200	200	107	109	134	136	177	183	185	185	185	193	214	220	250	256	271	275	274	283
326	Rogaland	Norway	Ro	2016-07-11	59.1489	6.01434			200	200	107	107	136	142	177	183	185	185	193	199	212	220	256	258	271	271	283	289
327	Rogaland	Norway	Ro	2016-07-11	59.1489	6.01434			194	200	107	107	136	142	179	179	185	185	197	197	214	220	256	262	271	275	274	289
328	Rogaland	Norway	Ro	2016-07-11	59.1489	6.01434			194	200	107	111	136	138	179	183	185	185	193	199	214	220	256	262	271	275	274	277
329	Rogaland	Norway	Ro	2016-07-11	59.1489	6.01434			200	200	109	109	138	142	179	179	185	185	197	197	220	220	256	256	271	279	274	289
330	Rogaland	Norway	Ro	2016-07-11	59.1489	6.01434			194	200	107	111	136	142	179	179	183	183	193	193	220	226	256	256	271	279	277	280
331	Rogaland	Norway	Ro	2016-07-11	59.1489	6.01434			194	200	109	111	136	136	177	179	181	183	193	193	220	220	258	260	271	279	280	283
332	Rogaland	Norway	Ro	2016-07-11	59.1489	6.01434			194	200	107	109	136	142	177	179	183	183	193	197	220	220	250	256	271	275	280	289
333	Rogaland	Norway	Ro	2016-07-11	59.1489	6.01434			194	200	107	107	136	142	177	179	183	183	193	197	214	220	256	256	271	275	280	283
334	Rogaland	Norway	Ro	2016-07-11	59.1489	6.01434			194	200	107	107	140	142	179	179	183	183	193	197	214	220	256	256	271	275	286	289
335	Rogaland	Norway	Ro	2016-07-11	59.1489	6.01434			194	200	107	107	136	140	179	179	183	183	193	197	214	220	250	256	271	271	280	289
336	Rogaland	Norway	Ro	2016-07-11	59.1489	6.01434			194	194	107	111	136	140	179	179	183	183	193	193	220	220	256	256	271	279	277	286
337	Rogaland	Norway	Ro	2016-07-11	59.1489	6.01434			194	194	107	107	136	136	179	183	183	183	193	197	220	226	256	256	271	279	274	277
338	Rogaland	Norway	Ro	2016-07-11	59.1489	6.01434			200	202	107	109	136	136	183	191	185	185	193	193	220	226	254	258	271	279	280	280
339	Rogaland	Norway	Ro	2016-07-11	59.1489	6.01434			200	200	107	109	138	142	183	193	183	183	197	199	212	220	260	262	271	279	274	283
340	Rogaland	Norway	Ro	2016-07-11	59.1489	6.01434			200	200	99	107	136	136	177	179	183	183	183	193	220	220	256	258	271	279	283	289
341	Mosede havn	Denmark	KB	2016-02-29	55.56	12.288			200	200	109	109	136	138	177	177	183	199	193	197	220	220	256	256	273	277	286	286
342	Mosede havn	Denmark	KB	2016-02-29	55.56	12.288			200	200	107	111	136	140	177	179	181	183	193	197	214	220	256	258	271	271	277	280
343	Mosede havn	Denmark	KB	2016-02-29	55.56	12.288			200	200	109	109	136	140	177	183	183	183	193	197	220	220	256	260	271	275	277	283
344	Mosede havn	Denmark	KB	2016-02-29	55.56	12.288			200	202	107	109	138	140	179	187	181	183	193	197	226	226	254	260	271	271	280	286
345	Mosede havn	Denmark	KB	2016-02-29	55.56	12.288			200	200	109	109	136	142	179	183	183	201	185	197	220	220	250	258	271	275	277	280
346	Mosede havn	Denmark	KB	2016-02-29	55.56	12.288			200	202	109	111	134	138	177	179	183	183	197	197	220	220	250	258	271	275	277	280
347	Mosede havn	Denmark	KB	2016-02-29	55.56	12.288			192	192	107	107	136	136	179	179	183	183	185	193	212	220	248	250	271	279	280	283
348	Mosede havn	Denmark	KB	2016-02-29	55.56	12.288			200	202	107	109	136	138	177	183	183	199	195	197	212	220	256	256	271	279	280	286
349	Mosede havn	Denmark	KB	2016-02-29	55.56	12.288			194	200	99	109	136	136	179	183	185	199	185	185	212	226	256	256	271	271	280	286
350	Mosede havn	Denmark	KB	2016-02-29	55.56	12.288			200	200	99	109	134	136	177	183	199	209	193	193	220	220	250	262	271	275	280	280
351	Mosede havn	Denmark	KB	2016-02-29	55.56	12.288			200	202	107	107	136	142	177	183	183	183	193	199	216	220	262	262	271	271	280	280
352	Mosede havn	Denmark	KB	2016-02-29	55.56	12.288			194	200	107	107	134	134	177	179	183	183	183	193	212	220	262	262	271	275	280	280
353	Mosede havn	Denmark	KB	2016-02-29	55.56	12.288			200	202	99	109	136	136	179	179	183	183	193	197	220	220	250	262	271	271	283	286
354	Køge Bay	Denmark	KB	2016-03-29	55.457	12.182			200	200	107	109	138	140	179	179	183	209	193	197	220	226	256	258	271	271	274	280
355	Køge Bay	Denmark	KB	2016-03-29	55.457	12.182			192	200	107	109	136	136	179	183	185	209	185	193	220	220	256	256	271	271	280	283
356	Køge Bay	Denmark	KB	2016-03-29	55.457	12.182			200	202	109	109	136	142	177	179	183	183	185	193	220	220	256	260	271	279	286	286
357	Køge Bay	Denmark	KB	2016-03-29	55.457	12.182			200	200	99	107	136	142	179	179	183	199	193	197	214	226	250	256	275	275	286	286
358	Køge Bay	Denmark	KB	2016-03-29	55.457	12.182			200	200	99	111	134	136	179	179	187	211	193	193	214	220	258	260	271	271	274	277
359	Køge Bay	Denmark	KB	2016-03-29	55.457	12.182			200	200	107	109	136	136	177	179	185	199	193	193	220	220	256	256	271	271	274	280
360	Køge Bay	Denmark	KB	2016-03-29	55.457	12.182			200	200	109	109	134	142	177	177	199	209	185	193	214	214	256	256	275	279	274	277
361	Køge Bay	Denmark	KB	2016-03-29	55.457	12.182			200	200	107	109	136	142	179	179	185	201	197	197	214	214	256	258	271	271	280	283
362	Køge Bay	Denmark	KB	2016-03-29	55.457	12.182			194	200	99	99	136	142	179	179	183	199	185	193	212	212	250	256	271	271	277	283
363	Køge Bay	Denmark	KB	2016-03-29	55.457	12.182			200	200	107	109	138	142	179	179	185	199	183	193	220	220	248	258	271	271	277	280
364	Køge Bay	Denmark	KB	2016-03-29	55.457	12.182			200	200	107	107			177	177	181	185	183	197	220	220	250	258	271	275	280	283
365	Køge Bay	Denmark	KB	2016-03-29	55.457	12.182			200	200	103	109			177	183	181	185	193	197	214	220	256	258	269	269	283	283
366	Køge Bay	Denmark	KB	2016-03-29	55.457	12.182			194	200	109	109			177	183	181	185	197	197	212	220	256	258	269	273	274	277
367	Køge Bay	Denmark	KB	2016-03-29	55.457	12.182			194	200	107	109	136	142	183	187	185	185	193	193	212	220	250	250	269	273	274	277
368	Køge Bay	Denmark	KB	2016-03-29	55.457	12.182			200	200	103	109			179	183	181	181	191	191	212	220	256	258	271	279
369	Køge Bay	Denmark	KB	2016-03-29	55.457	12.182			200	202	109	109	136	142	177	179	183	199	193	197	216	220	256	258	271	271	277	286
370	Køge Bay	Denmark	KB	2016-03-29	55.457	12.182			200	202	105	107	136	138	177	183	183	209	193	197	212	220	256	260	271	271	283	283
371	Öland	Sweden	Öl	2017-10-09	55.439	15.182	242	183	200	200	107	109			179	183			199	199	212	214	262	262	273	279
372	Öland	Sweden	Öl	2017-10-09	55.151	15.219	121	125	200	200	107	109			179	179			193	197	212	220	250	250	273	273
373	Öland	Sweden	Öl	2017-10-09	55.72	16.391	192	155	200	200	105	107	140	142	179	181	183	183	193	197	212	214	250	262	273	273	280	286
374	Öland	Sweden	Öl	2017-10-09	55.72	16.391	300	175	200	200	107	107	136	140	181	181	181	183	193	197	220	226	262	262	271	271	277	280
375	Öland	Sweden	Öl	2017-10-09	55.72	16.391	272	170	200	200	107	109			177	179			199	199	212	220	250	258	271	279
376	Öland	Sweden	Öl	2017-10-09	55.72	16.391	146	145	200	202	107	109	136	142	179	179	181	183	197	197	220	220	258	258	273	273	280	280
377	Öland	Sweden	Öl	2017-10-09	55.72	16.391	334	189	200	200	105	105			177	177	185	185	197	197	220	220	250	262	273	279
378	Öland	Sweden	Öl	2017-10-09	55.72	16.391	316	182	200	200	107	109			173	179			197	197	220	220	250	262	273	273
379	Öland	Sweden	Öl	2017-10-09	55.72	16.391	352	190	200	200	109	109			179	179			197	197	212	220	250	250	273	279
380	Öland	Sweden	Öl	2017-10-09	55.72	16.391	225	173	200	200	107	109	138	138	179	179			199	199	212	214	262	262	273	273
381	Öland	Sweden	Öl	2017-10-09	56.082	18.161	123	136	200	202	107	109			179	179	187	195	195	195	220	220	250	256	271	279
382	Öland	Sweden	Öl	2017-10-09	56.082	18.161	351	178	200	200	105	109	140	142	177	179	183	205	193	197	214	220	250	260	273	273	280	286
383	Öland	Sweden	Öl	2017-10-09	56.082	18.161	234	166	200	200	105	107	134	136	179	179	183	183	183	183	212	214	256	260	273	273	280	286
384	Öland	Sweden	Öl	2017-10-09	56.082	18.161	177	143	200	200	109	109			179	179	183	183	193	197	214	214	250	262	273	273
385	Öland	Sweden	Öl	2017-10-12	56.082	18.161	205	158	200	200	107	109	138	140	179	179	183	183	193	197	220	220	260	262	273	277	280	286
386	Öland	Sweden	Öl	2017-10-12	56.082	18.161	255	178	200	200	99	107	134	138	179	179	185	209	185	185	220	226	250	258	273	279	274	283
387	Gotska Sandön	Sweden	GS	2017-10-12	57.18	19.38	344	183	200	200	109	109			179	179	183	183	185	185	212	220	262	262	273	279
388	Gotska Sandön	Sweden	GS	2017-10-12	57.076	18.513	384	188	200	200	109	109			179	179	191	191	199	199	220	220	256	256	273	273
389	Gotska Sandön	Sweden	GS	2017-10-13	57.076	18.513	408	200			107	109	134	142	179	179	187	187	199	201	220	222	250	262	273	273
390	Gotska Sandön	Sweden	GS	2017-10-13	57.403	19.502	92	110	200	200	107	107			179	179	185	185	183	197	220	220	250	258	273	279	283	292
391	Gotska Sandön	Sweden	GS	2017-10-13	57.403	19.502	114	128	200	200	107	109	136	142	179	179	185	185	185	197	212	220	250	250	273	273	280	280
392	Gotska Sandön	Sweden	GS	2017-10-14	57.179	19.38	240	163	198	198	99	107	136	136	179	179	183	209	193	199	212	220	250	250	273	273	280	283
393	Gotska Sandön	Sweden	GS	2017-10-15	57.262	17.348	284	175	198	198	109	109	136	136	179	181	185	199	183	197	212	214	250	258	277	279	274	286
394	Gotska Sandön	Sweden	GS	2017-10-15	58.061	18.197	154	144	200	200	107	107	136	142	179	179	185	185	193	197	212	220	250	256	273	279	280	286
395	Gotska Sandön	Sweden	GS	2017-10-15	58.061	18.197	196	152	200	200	107	109			179	179			199	199	212	220	258	262	273	273
396	Gotska Sandön	Sweden	GS	2017-10-16	58.061	18.197	34	89	200	200	109	109			181	181	179	179	191	191	212	220	256	256	273	279
397	Gotska Sandön	Sweden	GS	2017-10-16	58.043	17.227	179	156	200	200	109	109	136	140	179	179	183	183	197	197	220	220	260	260	273	273	283	286
398	Gotska Sandön	Sweden	GS	2017-10-16	58.245	17.375	256	163	200	200	107	109	140	142	179	179	183	183	197	197	214	220	260	260	273	279	274	286
399	Gotska Sandön	Sweden	GS	2017-10-16	58.262	18.198	206	155	200	202	105	109	140	140	179	179	183	199	193	197	212	220	250	258	273	273	280	283
400	Gotska Sandön	Sweden	GS	2017-10-16	58.202	19.464	126	141	200	202	105	107	138	142	179	179	185	199	195	197	214	214	262	262	273	273	274	280
401	Gotska Sandön	Sweden	GS	2017-10-17	58.344	20.075	161	142	200	200	107	109			179	179			191	191	212	220	250	256	273	273
402	Gotska Sandön	Sweden	GS	2017-10-17	57.949	18.973	121	124	202	202	109	109			179	179			201	201	214	220	250	256	273	273
403	Gotska Sandön	Sweden	GS	2017-10-17	57.949	18.973	141	137	200	200	109	109			179	181			199	199	212	226	260	260	273	279
404	Gotska Sandön	Sweden	GS	2017-10-17	57.949	18.973	46	98	200	200	107	109	136	140	177	179	183	183	193	199	200	220	258	258	273	273	280	280
405	Gotska Sandön	Sweden	GS	2017-10-17	57.949	18.973	90	113	200	200	107	109	136	138	179	179	185	209	193	197	212	220	256	256	273	273	283	286
406	Gotska Sandön	Sweden	GS	2017-10-17	57.949	18.973	110	125	200	200	99	107			179	179	183	183	195	195	212	214	256	260	273	279
407	Gotska Sandön	Sweden	GS	2017-10-17	57.949	18.973	118	130	192	200	99	107			179	179			193	199	214	214	256	256	273	273
408	Gotska Sandön	Sweden	GS	2017-10-17	57.949	18.973	268	166	200	200	107	109			179	183			199	199	220	220	250	262	271	279
409	Gotska Sandön	Sweden	GS	2017-10-18	57.949	18.973	140	135	200	202	99	107			179	179			197	197	220	220	256	256	271	271
410	Gotska Sandön	Sweden	GS	2017-10-18	57.949	18.973	242	160	200	202	109	109			179	179	191	191	199	201	214	220	254	260	273	273
